# Supplementary material for: Unveiling the mechanism behind shell thickness-dependent X-ray excited optical and persistent luminescence in lanthanide-doped core/shell nanoparticles
Source: Royal Society of Chemistry journal article supplement (doi:10.1039/d4tc04256e), 2024-11-04
Supplement: d4tc04256e1.pdf [file d4tc04256e1.pdf]

## Supplementary Information

### Unveiling the Mechanism Behind Shell Thickness-Dependent X-Ray Excited Optical and Persistent Luminescence in Lanthanide-Doped Core/Shell Nanoparticles

Zezen Liu, Jingtao Zhao, Danyang Shen, Lei Lei\*, Shiqing Xu\*

Key Laboratory of Rare Earth Optoelectronic Materials and Devices of Zhejiang Province, College of Optical and Electronic Technology, China Jiliang University, Hangzhou 310018, China

\*Email: [leilei@cjl.u.edu.cn](mailto:leilei@cjl.u.edu.cn), [shiqingxu@cjl.u.edu.cn](mailto:shiqingxu@cjl.u.edu.cn)

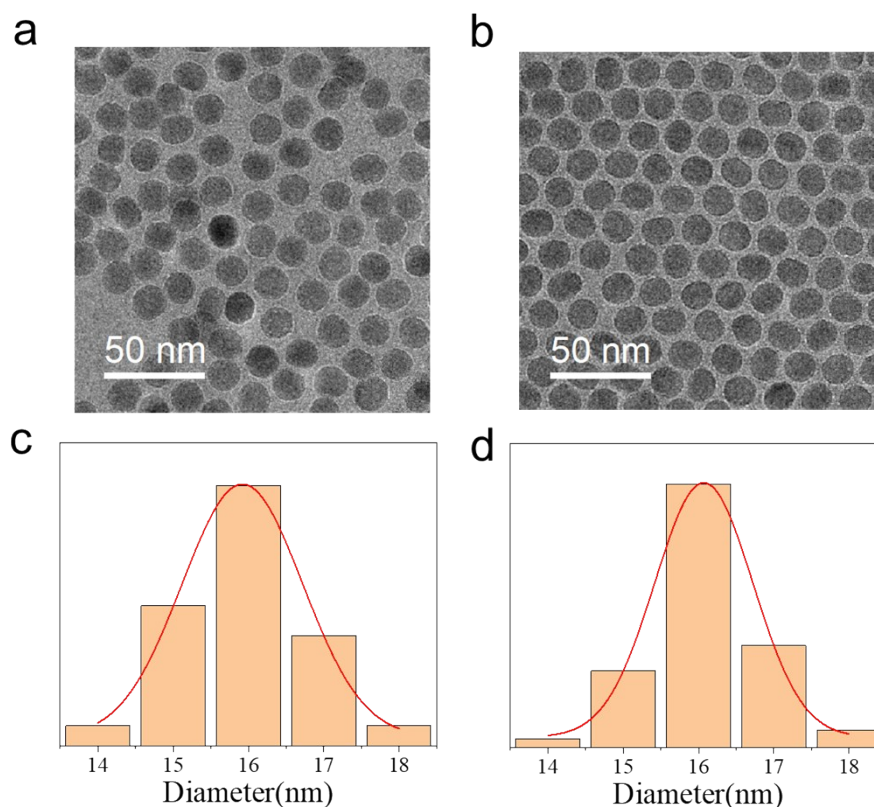

**Fig. S1** (a) TEM image of the first batch of NaYF<sub>4</sub>: Tb NPs. (b) TEM image of the second batch of NaYF<sub>4</sub>: Tb NPs. (c) histogram of size distributions of the first batch of NaYF<sub>4</sub>: Tb NPs. (d) histogram of size distributions of the second batch of NaYF<sub>4</sub>: Tb NPs.

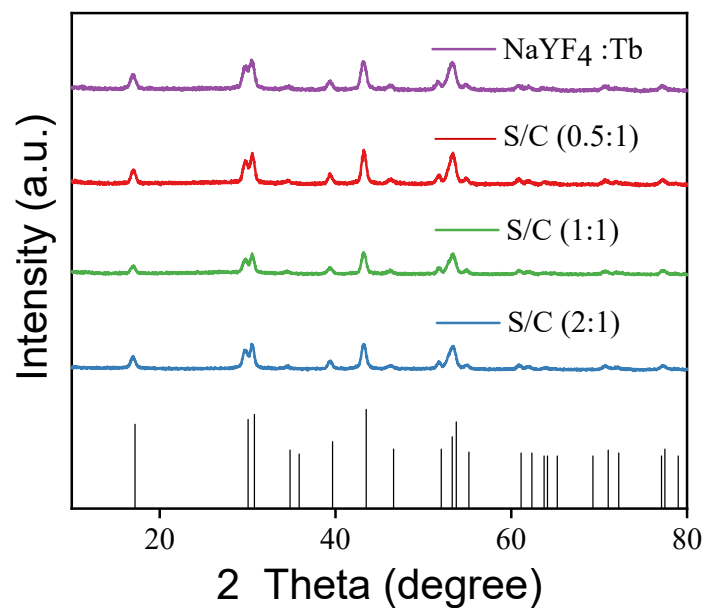

**Fig. S2** XRD patterns of the NaYF<sub>4</sub>: Tb@NaYF<sub>4</sub> NPs prepared with different S/C ratio.

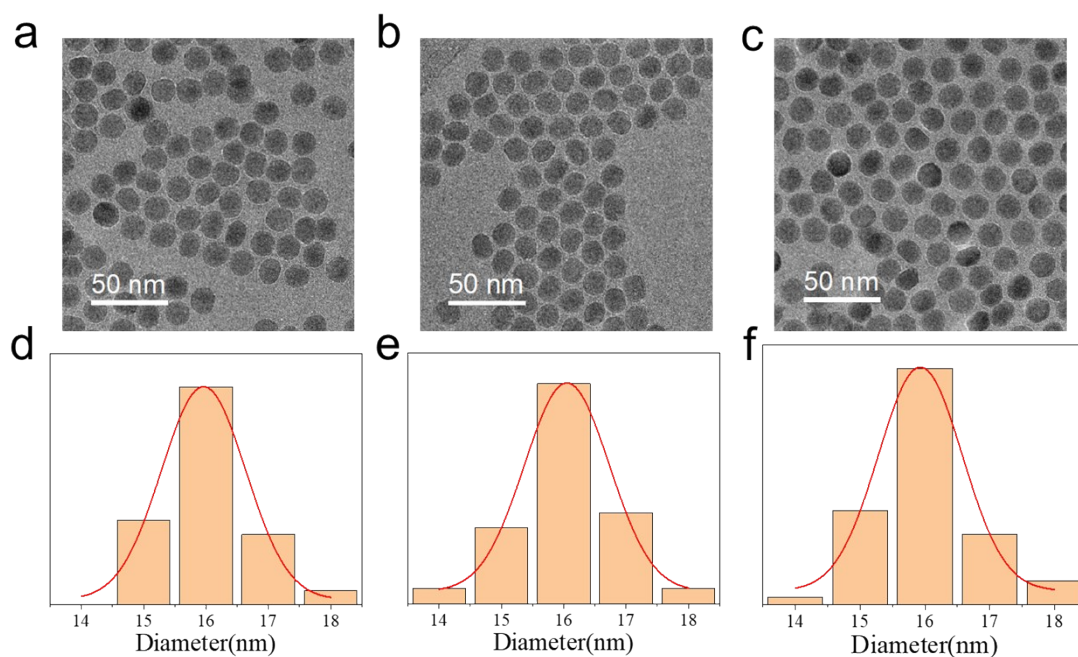

**Fig. S3** (a) TEM image of the first batch of NaYF<sub>4</sub>: Tb NPs. (b) TEM image of the second batch of NaYF<sub>4</sub>: Tb NPs. (c) TEM image of the third batch of NaYF<sub>4</sub>: Tb NPs. (d) histogram of size distributions of the first batch of NaYF<sub>4</sub>: Tb NPs. (e) histogram of size distributions of the second batch of NaYF<sub>4</sub>: Tb NPs. (f) histogram of size distributions of the third batch of NaYF<sub>4</sub>: Tb NPs.
